# Supplementary material
Source: publisher site journal article supplement (https://www.spandidos-publications.com/8582/downloadSupplementary)
Supplement: Supplementary file 1 [file downloadSupplementary]

Figure S1. Plant identification report.

Yunnan Branch, Institute of Medicinal Plant  
Development, Chinese Academy of Medical Sciences  
& Peking Union Medical College  
Herbarium Collection Record Form

Collector: Li Guang  
Collection Number: YNFS-LG-2021003  
Collection Date: September 10, 2021  
Collection Location: Nanyaoyuan, Jinghong  
City, Yunnan Province  
Habitat: Cultivated  
Altitude: 559m  
Number of Specimens: 2  
Abundance:  
Longitude: 100.789276E, Latitude:  
22.002609N  
Morphological Characteristics:  
Family Name (Chinese): Nanke, Family Name  
(Latin): Orchidaceae  
Common Name (Chinese): Zhuyelan  
Scientific Name: *Arundina graminifolia* (D.  
Don) Hochr.  
Common Name (Local): Wenshanghai (Dai)  
Remarks:

中国医学科学院药用植物研究所  
IMDY  
标本馆

中国医学科学院药用植物研究所云南分所标本馆(IMDY)  
IMDY 0052737  
00059563



*Arundina graminifolia*

CM 1 2 3 4 5 6 7 8 9 10  
MSII 中国数字植物标本馆  
China Digital Herbarium (CNH)

Collector: Li Guang  
Collection Number: YNFS-LG-2021003  
Chinese Name: Zhuyelan  
Scientific Name: *Arundina graminifolia* (D.  
Don) Hochr.  
Identifier: Zhangy Li Xia  
Identification Date: 2021.9.20
